# Supplementary material
Source: MDPI journal article supplement (https://www.mdpi.com/2076-3417/12/20/10413)
Supplement: s1 [file s1]

## SUPPLEMENTARY MATERIAL

# **ZIF-75 under pressure: Negative linear compressibility and pressure-induced instability**

Francisco Colmenero<sup>1,2</sup>, Vicente Timón<sup>2</sup>

<sup>1</sup>*Department of Chemical-Physics, Facultad de Ciencias Químicas, Universidad Complutense de Madrid, 28040 Madrid, Spain Madrid, Spain*

<sup>2</sup>*Instituto de Estructura de la Materia, Consejo Superior de Investigaciones Científicas, 28006 Madrid, Spain*

|                                                                                                               |      |
|---------------------------------------------------------------------------------------------------------------|------|
| Contents:                                                                                                     | Page |
| Figure S1. X-ray diffraction patterns of ZIF-75 derived from the tetragonal and monoclinic structures         | S.2  |
| Table S1. Most intense reflections in the X-ray diffraction pattern of tetragonal ZIF-75                      | S.3  |
| Table S2. Unit cell volume and lattice parameters of ZIF-75 under the effect of different external pressures. | S.4  |
| References                                                                                                    | S.5  |

**Figure S1.** X-ray diffraction patterns of ZIF-75 derived from the computed tetragonal ( $I41/a$ ) and monoclinic structures ( $C2/c$ ).

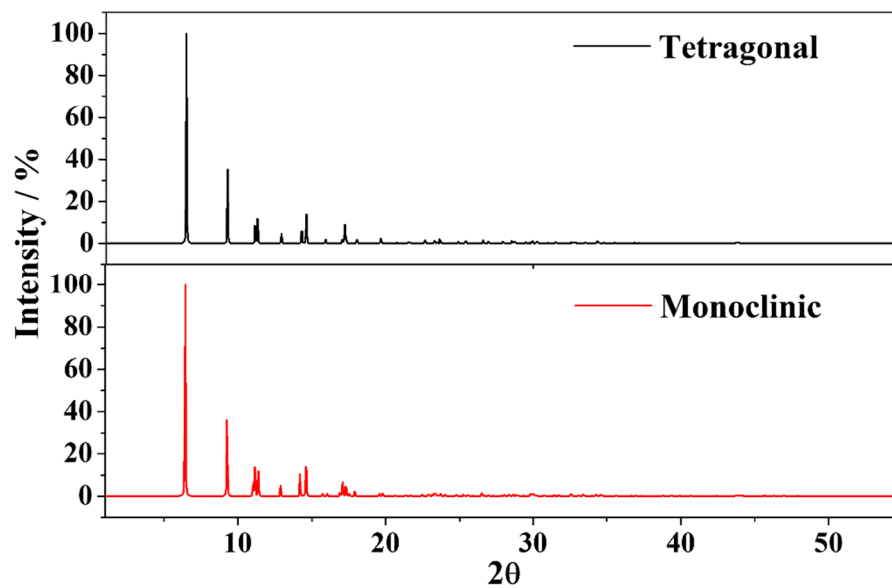

**Table S1.** Most intense reflections in the X-ray diffraction pattern of ZIF-75 (a) X-ray pattern derived from the tetragonal experimental crystal structure [1]; (b) X-ray pattern derived from the calculated tetragonal crystal structure.

| $[h\ k\ l]$ | Exp. [1]        |         |         | Calc.           |         |                        |
|-------------|-----------------|---------|---------|-----------------|---------|------------------------|
|             | $2\theta$ (deg) | $d$ (Å) | I (%)   | $2\theta$ (deg) | $d$ (Å) | $\Delta$ ( $2\theta$ ) |
| [0 1 1]     | 6.662           | 13.257  | 100.000 | 6.44            | 13.717  | 0.22                   |
| [0 2 0]     | 9.612           | 9.195   | 41.613  | 9.24            | 9.568   | 0.38                   |
| [-1 2 1]    | 11.704          | 7.555   | 23.109  | 11.27           | 7.847   | 0.44                   |
| [0 3 1]     | 15.166          | 5.837   | 18.668  | 14.59           | 6.068   | 0.58                   |
| [1 1 2]     | 11.476          | 7.705   | 12.778  | 11.11           | 7.956   | 0.36                   |
| [0 1 3]     | 14.692          | 6.024   | 12.405  | 14.27           | 6.203   | 0.43                   |
| [-1 3 2]    | 17.837          | 4.969   | 9.780   | 17.19           | 5.154   | 0.65                   |
| [0 2 2]     | 13.347          | 6.628   | 5.762   | 12.90           | 6.858   | 0.45                   |
| [0 0 4]     | 18.539          | 4.782   | 5.044   | 18.02           | 4.918   | 0.52                   |
| [1 2 3]     | 17.586          | 5.039   | 3.892   | 17.02           | 5.205   | 0.56                   |
| [2 2 2]     | 16.473          | 5.377   | 3.638   | 15.89           | 5.574   | 0.59                   |
| [1 4 1]     | 20.43           | 4.344   | 3.517   | 19.64           | 4.517   | 0.79                   |
| [0 3 5]     | 27.459          | 3.246   | 3.376   | 26.60           | 3.349   | 0.86                   |
| [1 5 4]     | 31.034          | 2.879   | 3.316   | 29.93           | 2.983   | 1.11                   |
| [3 4 1]     | 24.629          | 3.612   | 3.314   | 23.67           | 3.757   | 0.96                   |
| [1 3 2]     | 17.837          | 4.969   | 3.037   | 17.19           | 5.154   | 0.65                   |
| [-2 5 3]    | 29.653          | 3.010   | 2.892   | 28.55           | 3.124   | 1.11                   |
| [-1 5 2]    | 26.391          | 3.375   | 2.328   | 25.38           | 3.506   | 1.01                   |
| [1 3 4]     | 24.074          | 3.694   | 2.274   | 23.29           | 3.817   | 0.79                   |
| [2 3 1]     | 17.985          | 4.928   | 2.125   | 17.29           | 5.124   | 0.69                   |
| [-2 3 3]    | 22.303          | 3.983   | 2.102   | 21.52           | 4.125   | 0.78                   |
| [0 2 6]     | 29.633          | 3.0122  | 1.716   | 28.76           | 3.1016  | 0.87                   |

**Table S2.** Unit cell volume and lattice parameters of ZIF-75 (I41/*a*) under the effect of different external isotropic pressures.

| <b>P (GPa)</b> | <b>Vol. (Å<sup>3</sup>)</b> | <b><i>a</i> (Å)</b> | <b><i>b</i> (Å)</b> | <b><i>c</i> (Å)</b> | <b><i>α</i> (deg)</b> | <b><i>β</i> (deg)</b> | <b><i>γ</i>(deg)</b> |
|----------------|-----------------------------|---------------------|---------------------|---------------------|-----------------------|-----------------------|----------------------|
| -1.0000        | 9145.8664                   | 21.5555             | 21.5555             | 19.6837             | 90.00                 | 90.00                 | 90.00                |
| -0.7509        | 8766.0596                   | 21.1826             | 21.1826             | 19.5365             | 90.00                 | 90.00                 | 90.00                |
| -0.5000        | 8472.7248                   | 20.9067             | 20.9067             | 19.3844             | 90.00                 | 90.00                 | 90.00                |
| -0.2500        | 8211.1779                   | 20.5558             | 20.5558             | 19.4328             | 90.00                 | 90.00                 | 90.00                |
| -0.1256        | 7757.1256                   | 20.1081             | 20.1081             | 19.1848             | 90.00                 | 90.00                 | 90.00                |
| -0.0629        | 7524.3086                   | 19.9030             | 19.9030             | 18.9946             | 90.00                 | 90.00                 | 90.00                |
| -0.0003        | 7203.3094                   | 19.1356             | 19.1356             | 19.6719             | 90.00                 | 90.00                 | 90.00                |
| 0.0626         | 6962.3737                   | 18.6261             | 18.6261             | 20.0685             | 90.00                 | 90.00                 | 90.00                |
| 0.0939         | 6797.0337                   | 18.2930             | 18.2930             | 20.3119             | 90.00                 | 90.00                 | 90.00                |
| 0.1094         | 6771.1421                   | 18.2582             | 18.2582             | 20.3117             | 90.00                 | 90.00                 | 90.00                |
| 0.1147         | 6764.3872                   | 18.2444             | 18.2444             | 20.3222             | 90.00                 | 90.00                 | 90.00                |
| 0.1249         | 3437.9886                   | 13.2513             | 13.2513             | 19.5789             | 90.00                 | 90.00                 | 90.00                |
| 0.2498         | 3389.9991                   | 13.1684             | 13.1684             | 19.5494             | 90.00                 | 90.00                 | 90.00                |
| 0.5000         | 3291.0852                   | 12.9585             | 12.9585             | 19.5987             | 90.00                 | 90.00                 | 90.00                |
| 0.7499         | 3240.5895                   | 12.8790             | 12.8790             | 19.5370             | 90.00                 | 90.00                 | 90.00                |
| 0.9998         | 3180.9584                   | 12.7789             | 12.7789             | 19.4791             | 90.00                 | 90.00                 | 90.00                |

## References

- [1] Tian, Y. Q.; Zhao, Y. M., Chen, Z. X. Zhang, G. N., Weng, L. H.; Zhao, D. Y. Design and Generation of Extended Zeolitic Metal–Organic Frameworks (ZMOFs): Synthesis and Crystal Structures of Zinc(II) Imidazolate Polymers with Zeolitic Topologies. *Chem. Eur. J.* **2007**, *13*, 4146 – 4154.
